# Supplementary material for: Comparative morphology of the mouthparts of the megadiverse South African monkey beetles (Scarabaeidae: Hopliini): feeding adaptations and guild structure
Source: PeerJ. 2016 Jan 21;4:e1597. doi: 10.7717/peerj.1597 (PMC4727957; doi:10.7717/peerj.1597)
Supplement: Supplemental Information 4 [file peerj-04-1597-s004.xlsx]

## Sheet: measurements
Species	mandible	mandible	mola	lacinia mobilis	lacinia mobilis	cardo	cardo	stipes	stipes	galea	galea	mandible	lacinia mobilis	mandible	lacinia mobilis	mandible:	cardo	stipes	galea
	length [mm]	width [mm]	length [mm]	length [mm]	width [mm]	length [mm]	width [mm]	length [mm]	width [mm]	length [mm]	width [mm]	ratio	ration	length*width	length*width	lacinia mobilis	ratio	ratio	ratio
Anisochelus inornatus	0.5	0.53	0.17	0.29	0.12	0.23	0.31	0.54	0.31	0.17	0.19	0.943396	2.41667	0.265	0.0348	7.61494	0.741935	1.74194	0.894737
Anisonyx ursus	0.62	0.44	0.21	0.42	0.19	0.48	0.11	0.89	0.15	0.39	0.07	1.40909	2.21053	0.2728	0.0798	3.41855	4.36364	5.93333	5.57143
Chasme decora	0.38	0.41	0.21	0.21	0.1	0.33	0.09	0.39	0.17	0.23	0.11	0.926829	2.1	0.1558	0.021	7.41905	3.66667	2.29412	2.09091
Chasme sp.	0.44	0.47	0.22	0.22	0.09	0.18	0.28	0.46	0.28	0.19	0.17	0.93617	2.44444	0.2068	0.0198	10.4444	0.642857	1.64286	1.11765
Clania glenlyonensis	0.59	0.64	0.15	0.39	0.06	0.21	0.36	0.67	0.41	0.23	0.22	0.921875	6.5	0.3776	0.0234	16.1368	0.583333	1.63415	1.04545
Clania macgregori	0.81	0.76	0.27	0.53	0.15	nm	nm	0.8	0.5	0.18	0.23	1.06579	3.53333	0.6156	0.0795	7.7434	na	1.6	0.782609
Congella sp.	0.73	0.71	0.24	0.34	0.08	0.31	0.37	0.59	0.39	0.19	0.23	1.02817	4.25	0.5183	0.0272	19.0551	0.837838	1.51282	0.826087
Dolichiomicroscelis gracilis	0.33	0.3	0.09	0.19	0.19	nm	nm	0.31	0.16	0.08	0.1	1.1	1	0.099	0.0361	2.74238	na	1.9375	0.8
Heterochelus pickeri	0.48	0.38	0.04	0.28	0.08	0.23	0.25	0.47	0.27	0.2	0.17	1.26316	3.5	0.1824	0.0224	8.14286	0.92	1.74074	1.17647
Kubousa gentilis	na	na	na	na	na	na	na	na	na	na	na	na	na	na	na	na	na	na	na
Lepisia ornatissima	0.6	0.6	0.31	0.4	0.12	0.27	0.34	0.62	0.37	0.19	0.18	1	3.33333	0.36	0.048	7.5	0.794118	1.67568	1.05556
Lepisia rupicola	0.5	0.5	0.22	0.31	0.13	0.24	0.21	0.53	0.35	0.14	0.18	1	2.38462	0.25	0.0403	6.20347	1.14286	1.51429	0.777778
Lepithrix sp.	0.53	0.57	0.22	0.36	0.15	0.24	0.15	0.56	0.28	0.42	1.13	0.929825	2.4	0.3021	0.054	5.59444	1.6	2	0.371681
Mauromecistoplia nieuwoudtvillensis	0.74	0.71	0.32	0.33	0.07	0.31	0.38	0.62	0.37	0.21	0.24	1.04225	4.71429	0.5254	0.0231	22.7446	0.815789	1.67568	0.875
Pachycnema calcarata	0.48	0.42	0.13	0.31	0.1	0.3	0.08	0.53	0.18	0.34	0.1	1.14286	3.1	0.2016	0.031	6.50323	3.75	2.94444	3.4
Pachycnema crassipes	0.53	0.5	0.24	0.36	0.22	0.38	0.12	0.63	0.21	0.3	0.11	1.06	1.63636	0.265	0.0792	3.34596	3.16667	3	2.72727
Pachycnema flavolineata	0.47	0.52	0.24	0.33	0.16	0.24	0.26	0.53	0.29	0.3	0.15	0.903846	2.0625	0.2444	0.0528	4.62879	0.923077	1.82759	2
Scelophysa scheffoldi	0.61	0.66	0.27	0.35	0.13	na	na	0.73	0.42	0.17	0.23	0.924242	2.69231	0.4026	0.0455	8.84835	na	1.7381	0.73913
